## Correction

# Correction: Baseline CD4+ T Cell Counts Correlates with HIV-1 Synonymous Rate in HLA-B\*5701 Subjects with Different Risk of Disease Progression

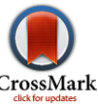

## The PLOS Computational Biology Staff

There is an error in the author list of this manuscript. The eighth author's name is spelled incorrectly. The correct name is: Annika C. Karlsson.

## Reference

1. Norström MM, Veras NM, Huang W, Proper MCF, Cook J, et al. (2014) Baseline CD4+ T Cell Counts Correlates with HIV-1 Synonymous Rate in HLA-B\*5701 Subjects with Different Risk of Disease Progression. PLoS Comput Biol 10(9): e1003830. doi:10.1371/journal.pcbi.1003830

**Citation:** The PLOS Computational Biology Staff (2014) Correction: Baseline CD4+ T Cell Counts Correlates with HIV-1 Synonymous Rate in HLA-B\*5701 Subjects with Different Risk of Disease Progression. PLoS Comput Biol 10(11): e1004000. doi:10.1371/journal.pcbi.1004000

**Published:** November 3, 2014

**Copyright:** © 2014 The PLOS Computational Biology Staff. This is an open-access article distributed under the terms of the Creative Commons Attribution License, which permits unrestricted use, distribution, and reproduction in any medium, provided the original author and source are credited.
